# Supplementary material for: Child Conduct Problems Across Home and School Contexts: a Person-Centered Approach
Source: Springer Nature journal article supplement (doi:10.1007/s10862-016-9564-8), 2016-09-06

**Figure S2**. Conditional response probabilities of responding to the second and third response categories (combined) for the five-class LCA model. The conditional response probabilities indicate the probability that an individual in a given class will endorse an item. P = Primary Caregiver. T = Teacher. Classes are numbered in decreasing prevalence.


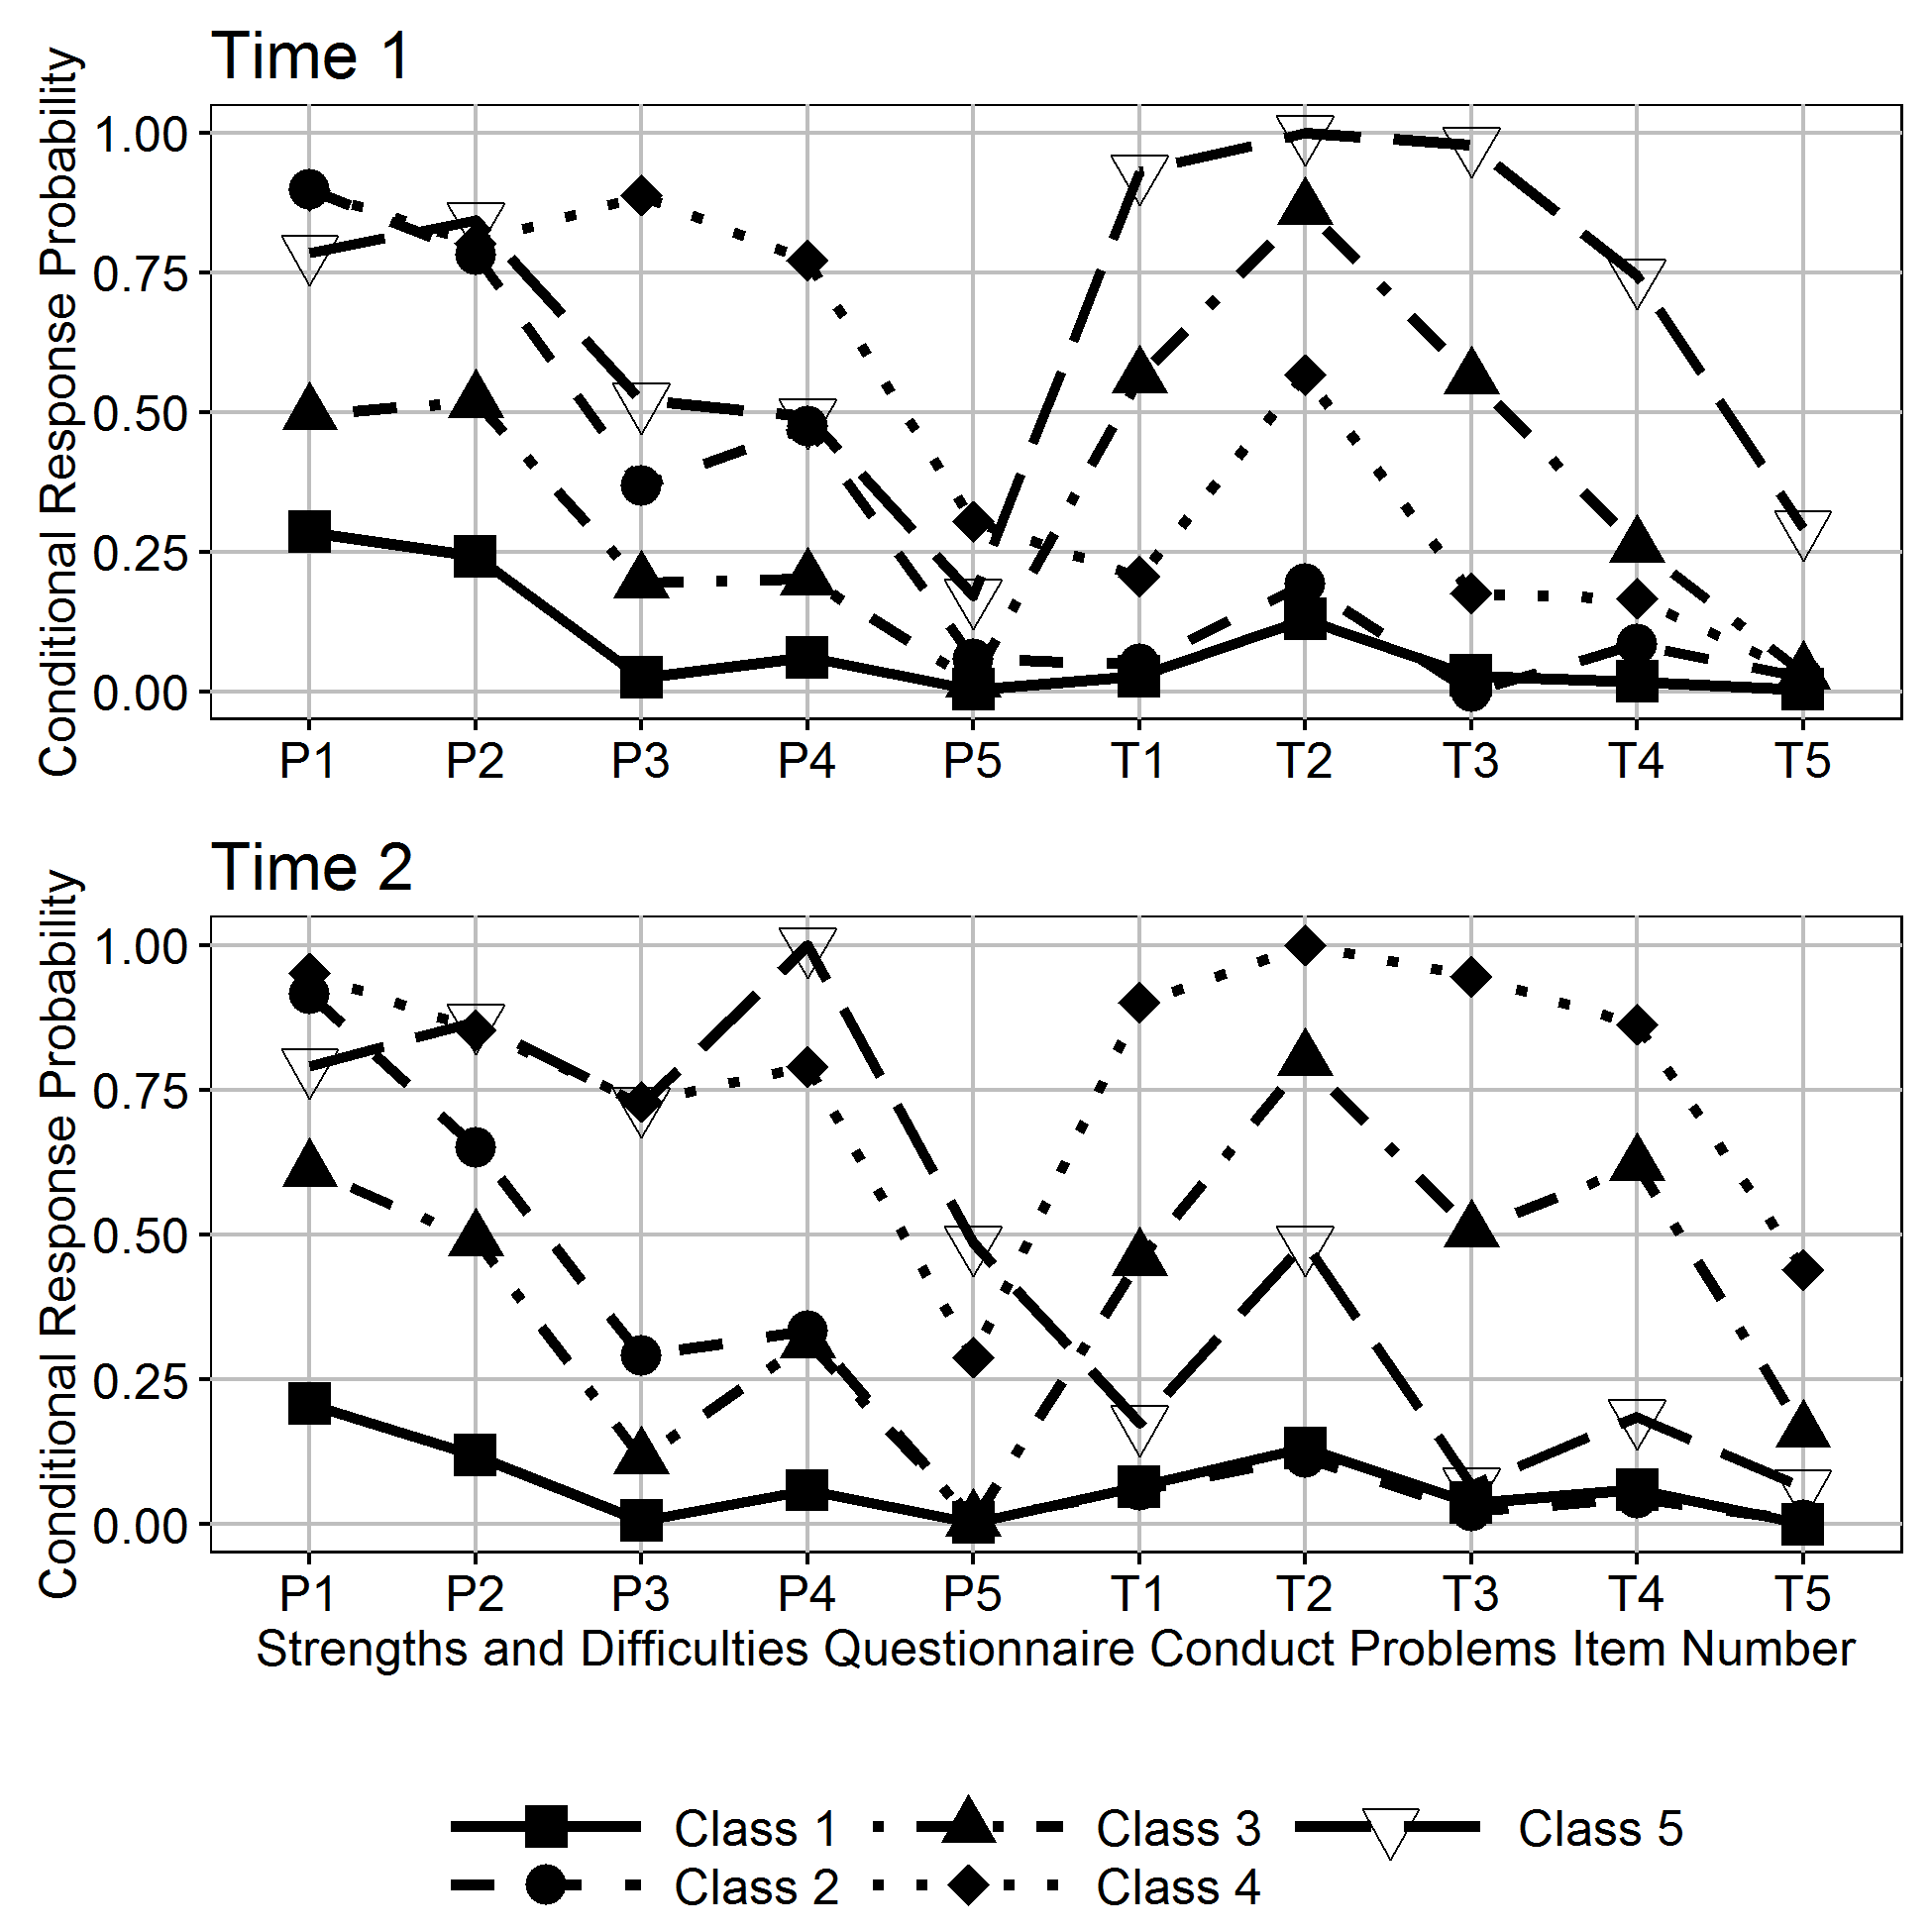

Supplement: MOESM2 [file 10657166]
