# Supplementary material for: Child Conduct Problems Across Home and School Contexts: a Person-Centered Approach
Source: Springer Nature journal article supplement (doi:10.1007/s10862-016-9564-8), 2016-09-06

**Figure S3**. Latent Transition Probabilities from Time 1 to Time 2 for the Four-Class Latent Transition Analysis Model without Measurement Invariance Constraints


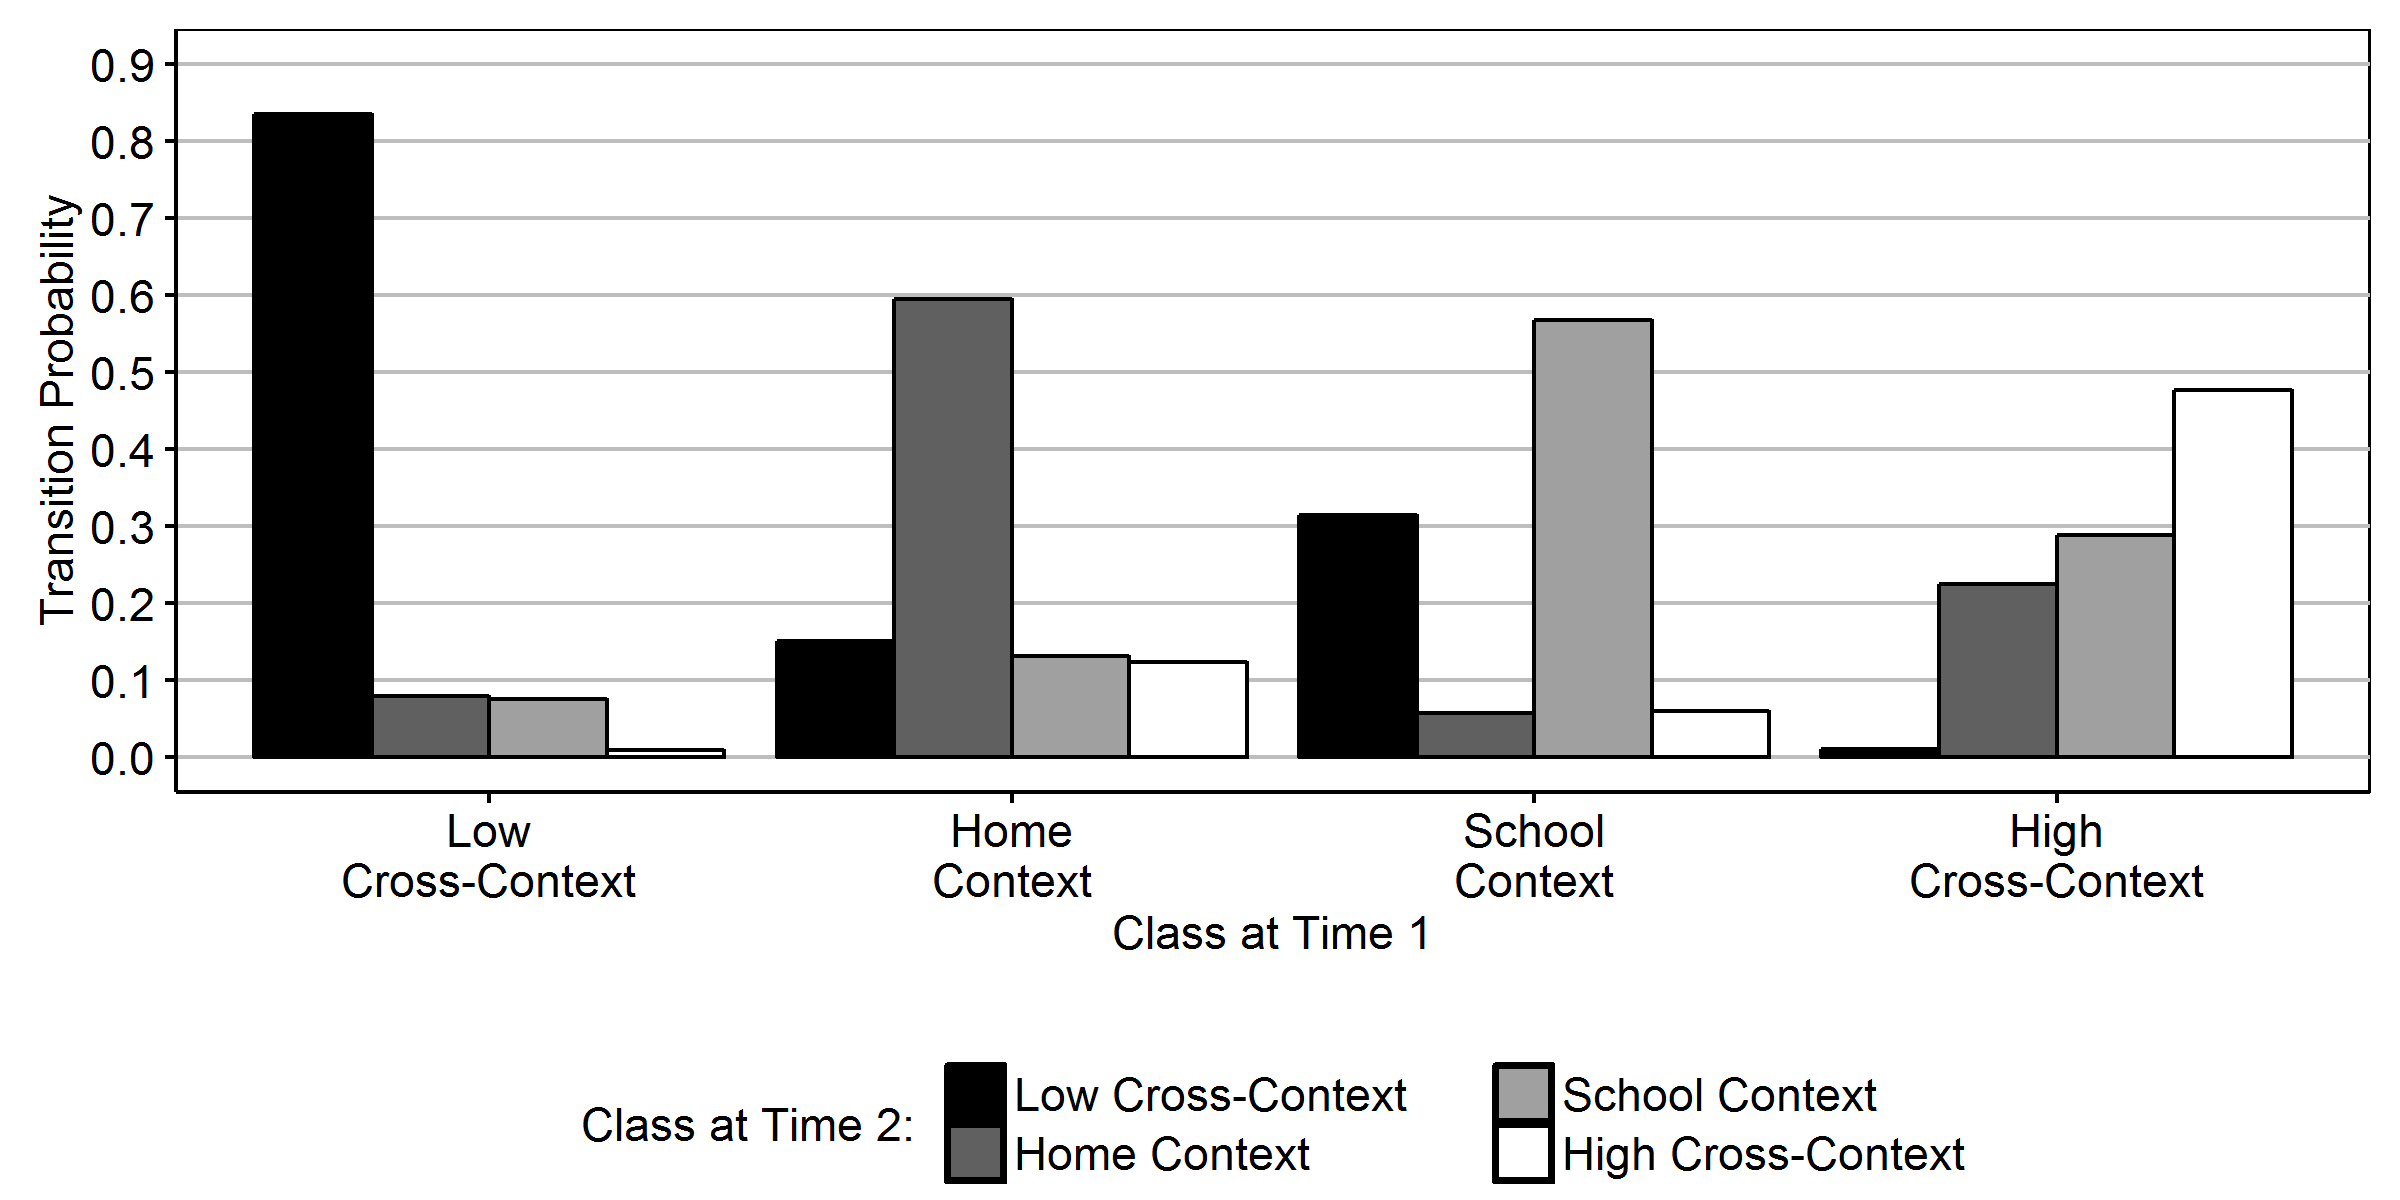

Supplement: MOESM3 [file 10657166]
